# Supplementary material for: Highly conductive nano-sized Magnéli phases titanium oxide (TiOx)
Source: PubMed Central journal article supplement (PMC5473814; doi:10.1038/s41598-017-03509-y), 2017-06-16
Supplement: 41598_2017_3509_MOESM1_ESM.pdf [file 41598_2017_3509_MOESM1_ESM.pdf]

Supporting Information

# Highly conductive nano-sized Magnèli phases titanium oxide (TiO<sub>x</sub>)

*Aditya F. Arif<sup>1</sup>, Ratna Balgis<sup>1</sup>, Takashi Ogi<sup>1,\*</sup>, Ferry Iskandar<sup>2</sup>, Akihiro Kinoshita<sup>3</sup>, Keitaro Nakamura<sup>3</sup>, Kikuo Okuyama<sup>1</sup>*

<sup>1</sup>Department of Chemical Engineering, Graduate School of Engineering, Hiroshima University,  
1-4-1 Kagamiyama, Higashi-Hiroshima 739-8527, Japan

<sup>2</sup>Department of Physics, Institut Teknologi Bandung, Jalan Ganesha No. 10 Bandung 40132, West  
Java, Indonesia

<sup>3</sup>Research Center for Production and Technology, Nisshin Seifun Group Inc., 5-3-1, Tsurugaoka,  
Fujimino City, Saitama 356-8511, Japan

## 1. Raw data of XAFS spectra

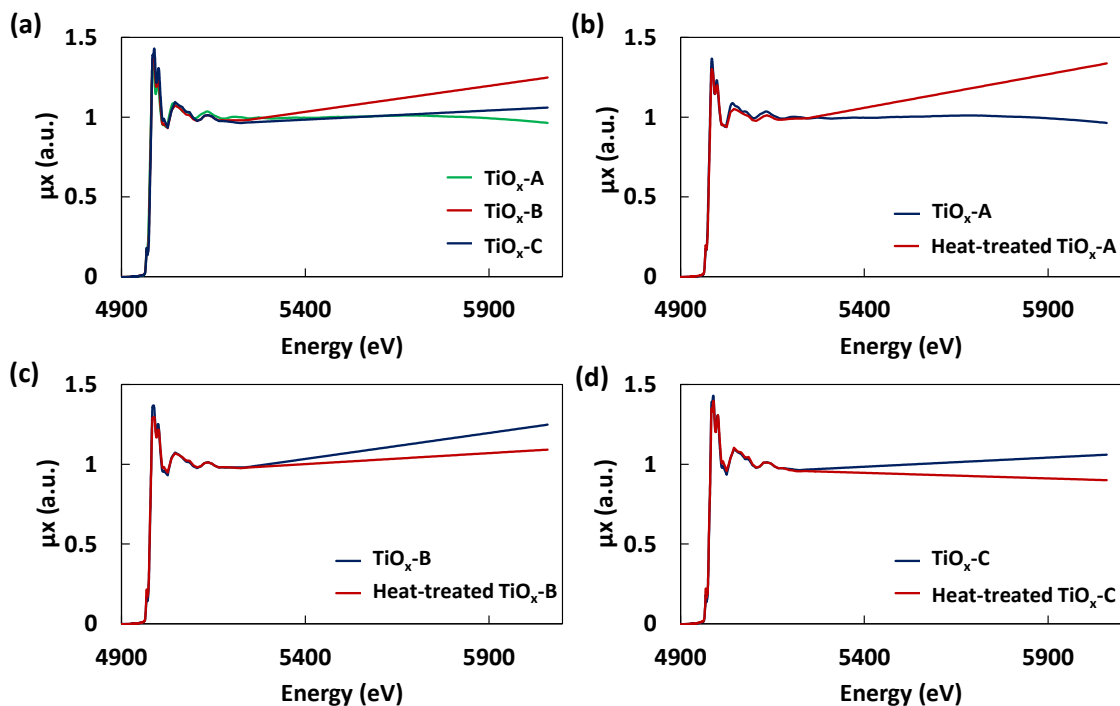

Figure S1. XAFS spectra of (a) TiO<sub>x</sub>-A, TiO<sub>x</sub>-B, and TiO<sub>x</sub>-C, and comparison of XAFS spectra before and after heat-treatment of (b) TiO<sub>x</sub>-A, (c) TiO<sub>x</sub>-B, and (d) TiO<sub>x</sub>-C.

## 2. Raw data of XAFS spectra

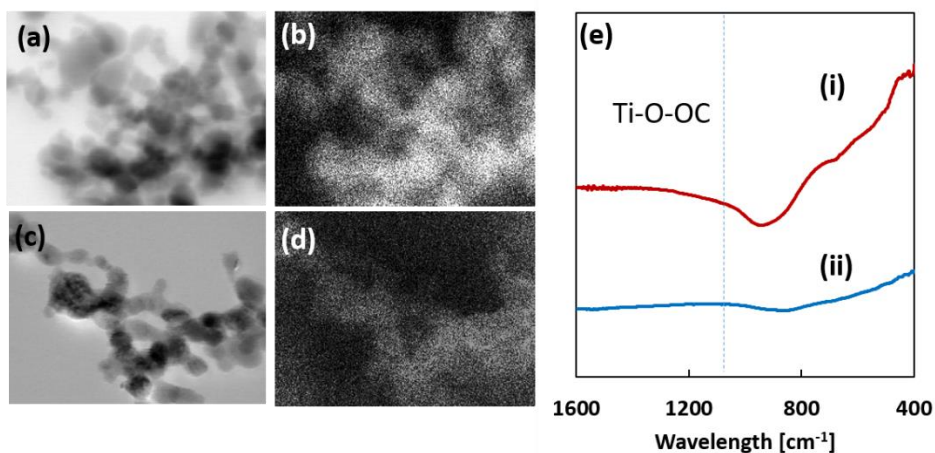

Figure S2. TEM image and carbon elemental mapping of (a, b) TiO<sub>x</sub>-A and (c, d) heat-treated TiO<sub>x</sub>-A show a reduction in the carbon intensity after heat treatment. This result is aligned with (e) FT-IR spectrum of (i) TiO<sub>x</sub>-A and (ii) heat-treated TiO<sub>x</sub>-A which show a significant decrease in the Ti-O-OC peak intensity at 1103 cm<sup>-1</sup> after heat treatment.

### 3. Phase identification from XRD spectra

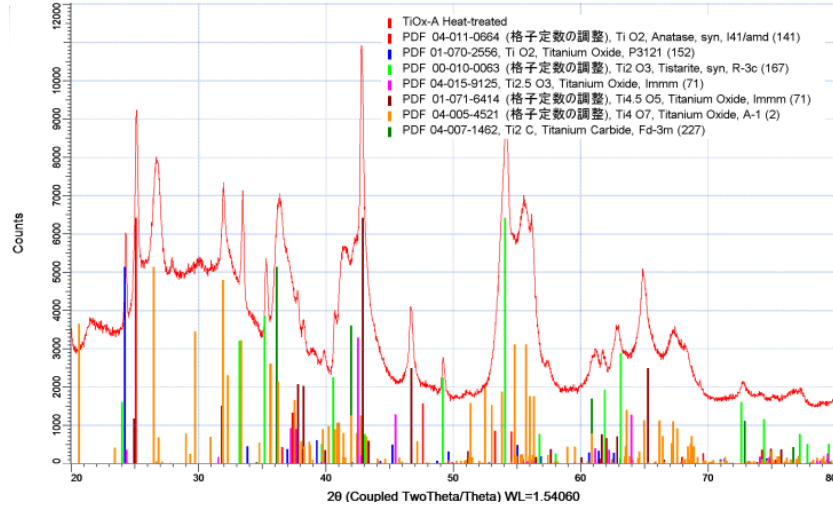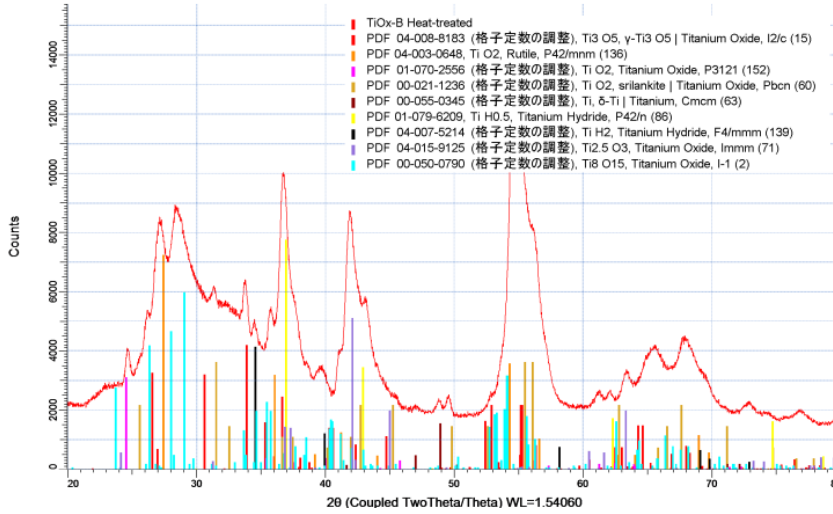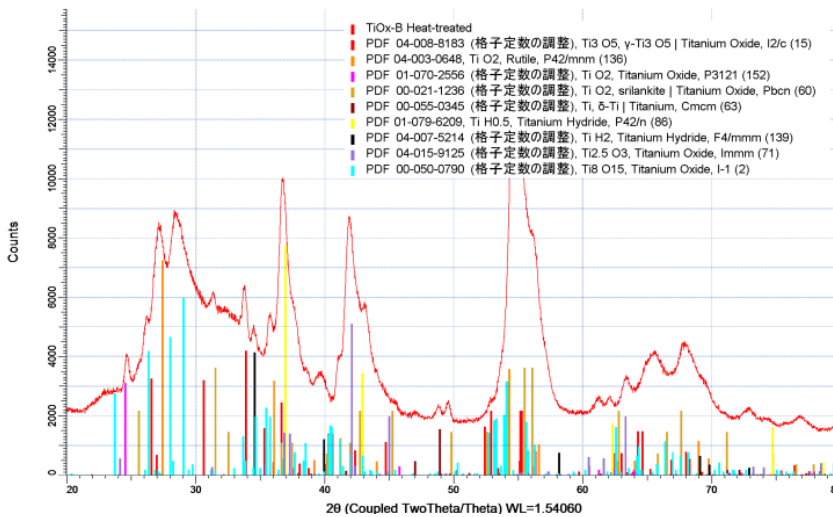

Figure S3. Raw XRD spectra and peak assignment of heat-treated (a) TiO<sub>x</sub>-A, (b) TiO<sub>x</sub>-B and (c) TiO<sub>x</sub>-C

Table S1. Summary of identified phases in TiO<sub>x</sub>-A from XRD analysis

| Phase                            | PDF No.     | As-synthesized | Heat-treated |
|----------------------------------|-------------|----------------|--------------|
| TiO <sub>2</sub>                 | 04-011-0664 | √              | √            |
| TiO <sub>2</sub>                 | 01-070-2556 | √              | √            |
| Ti <sub>2</sub> O <sub>3</sub>   | 00-010-0063 | √              | √            |
| Ti <sub>2.5</sub> O <sub>3</sub> | 04-015-9125 | -              | √            |
| Ti <sub>4.5</sub> O <sub>5</sub> | 01-071-6414 | √              | √            |
| Ti <sub>4</sub> O <sub>7</sub>   | 04-005-4521 | √              | √            |
| Ti <sub>2</sub> C                | 04-007-1462 | √              | √            |

Table S2. Summary of identified phases in TiO<sub>x</sub>-B from XRD analysis

| Phase                                                                   | PDF No.     | As-synthesized | Heat-treated |
|-------------------------------------------------------------------------|-------------|----------------|--------------|
| Ti <sub>3</sub> O <sub>5</sub>                                          | 04-008-8183 | √              | √            |
| Ti <sub>2.5</sub> O <sub>3</sub>                                        | 04-015-9125 | -              | √            |
| TiO <sub>2</sub><br>(rutile)                                            | 04-003-0648 | √              | √            |
| TiO <sub>2</sub> (P3121)                                                | 01-070-2556 | √              | √            |
| TiO <sub>2</sub> (srilankite)                                           | 00-021-1236 | √              | √            |
| Ti                                                                      | 00-055-0345 | √              | √            |
| Ti <sub>4</sub> O <sub>7</sub>                                          | 04-005-4521 | √              | -            |
| TiH <sub>0.5</sub>                                                      | 01-079-6209 | √              | √            |
| TiH <sub>2</sub>                                                        | 04-007-5214 | -              | √            |
| Ti <sub>8</sub> O <sub>15</sub>                                         | 00-050-0790 | -              | √            |
| Ti <sub>0.374</sub> O <sub>0.5</sub> (OH) <sub>0.5</sub><br>(kleberite) | 01-076-5388 | √              | √            |

Table S3. Summary of identified phases in TiO<sub>x</sub>-C from XRD analysis

| Phase                            | PDF No.     | As-synthesized | Heat-treated |
|----------------------------------|-------------|----------------|--------------|
| Ti <sub>3</sub> O <sub>5</sub>   | 04-008-8183 | √              | √            |
| Ti <sub>4.5</sub> O <sub>5</sub> | 01-071-6414 | √              | √            |
| TiO <sub>2</sub><br>(rutile)     | 04-003-0648 | √              | √            |
| TiO <sub>2</sub> (P3121)         | 01-070-2556 | √              | √            |
| TiO <sub>2</sub> (srilankite)    | 00-021-1236 | √              | √            |
| Ti <sub>2</sub> O <sub>3</sub>   | 00-010-0063 | √              | √            |

|                                                                         |             |   |   |
|-------------------------------------------------------------------------|-------------|---|---|
| Ti <sub>4</sub> O <sub>7</sub>                                          | 04-005-4521 | √ | √ |
| TiH <sub>0.5</sub>                                                      | 01-079-6209 | √ | √ |
| TiH <sub>2</sub>                                                        | 04-007-5214 | - | √ |
| Ti <sub>8</sub> O <sub>15</sub>                                         | 00-050-0790 | √ | - |
| TiC <sub>8</sub>                                                        | 00-051-0622 | - | √ |
| Ti <sub>0.374</sub> O <sub>0.5</sub> (OH) <sub>0.5</sub><br>(kleberite) | 01-076-5388 | √ | √ |

#### 4. Electrochemical characteristics of Ti<sub>4</sub>O<sub>7</sub> synthesized *via* high temperature H<sub>2</sub> reduction of rutile TiO<sub>2</sub>

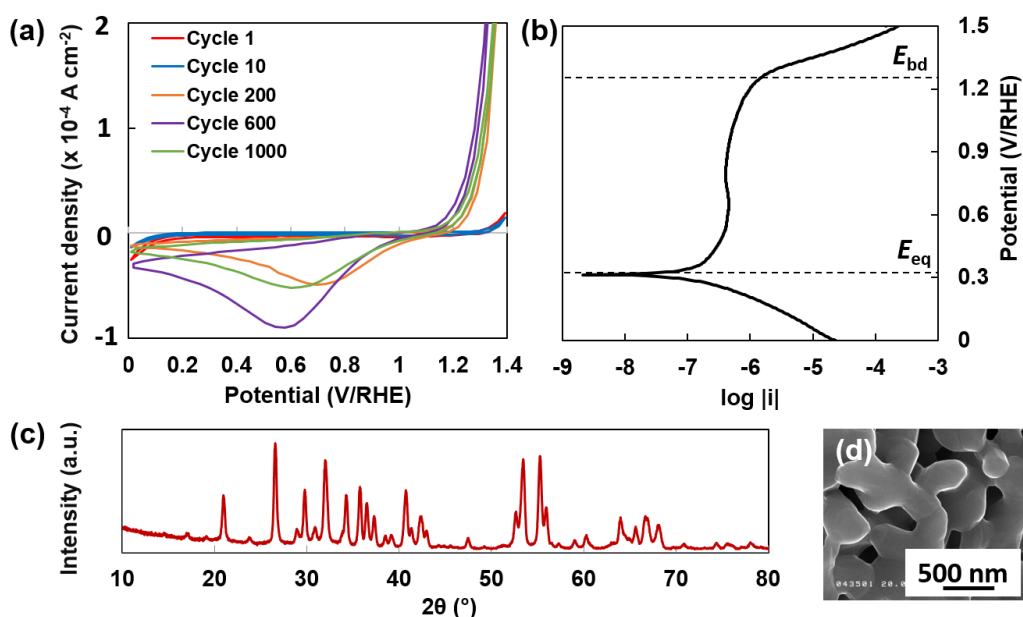

Figure S4. (a) cyclic voltammogram and (b) potentiodynamic curve of Ti<sub>4</sub>O<sub>7</sub> in oxygen-saturated 1M HCl. (c) XRD spectra of Ti<sub>4</sub>O<sub>7</sub> sample showing Ti<sub>4</sub>O<sub>7</sub> peaks (Ref. ICDD No. 50-787) and (d) SEM images of Ti<sub>4</sub>O<sub>7</sub> particles

Table S4. Comparison of electrochemical characteristics of TiO<sub>x</sub>-A and Ti<sub>4</sub>O<sub>7</sub>

| No | Parameter                 | Unit               | TiO <sub>x</sub> -A   | Ti <sub>4</sub> O <sub>7</sub> |
|----|---------------------------|--------------------|-----------------------|--------------------------------|
| 1. | $E_{eq}$                  | (V/RHE)            | 0.11                  | 0.31                           |
| 2. | $E_{bd}$                  | (V/RHE)            | 1.3                   | 1.3                            |
| 3. | Corrosion current density | A cm <sup>-2</sup> | $5.37 \times 10^{-7}$ | $1.58 \times 10^{-7}$          |
| 4. | Corrosion rate            | mm per year        | 0.006                 | 0.00005                        |
